# Supplementary material for: PTP61F Mediates Cell Competition and Mitigates Tumorigenesis
Source: MDPI journal article supplement (doi:10.3390/ijms222312732), 2021-11-25
Supplement: s1 [file s1]

**Supplementary Table S2. Genotypes.** This table contains the full genotypes of each sample shown in the figures and discussed in the text.

| Figure | Panel(s)  | Genotype                                                                                                                                                                                                                           |
|--------|-----------|------------------------------------------------------------------------------------------------------------------------------------------------------------------------------------------------------------------------------------|
| 1      | A,A',C,C' | <i>hsFLP<sup>122</sup></i> ; ; <i>Ubi-GFP, FRT80B / FRT80B</i>                                                                                                                                                                     |
|        | B,B',D,D' | <i>hsFLP<sup>122</sup></i> ; ; <i>Ubi-GFP, FRT80B / Ptp61F<sup>A</sup>, FRT80B</i>                                                                                                                                                 |
| 2      | A         | <i>y<sup>-</sup>, w<sup>-</sup>, eyFLP<sup>2</sup> ; Act&gt;y<sup>+</sup>&gt;GAL4, UAS-GFP / UAS-myrRFP ; FRT82B, tub-GAL80 / UAS-Dcr2, FRT82B</i>                                                                                 |
|        | B         | <i>y<sup>-</sup>, w<sup>-</sup>, eyFLP<sup>2</sup> ; Act&gt;y<sup>+</sup>&gt;GAL4, UAS-GFP / UAS-Ptp61F<sup>RNAi</sup> (v37436) ; FRT82B, tub-GAL80 / UAS-Dcr2, FRT82B</i>                                                         |
|        | C         | <i>y<sup>-</sup>, w<sup>-</sup>, eyFLP<sup>2</sup> ; Act&gt;y<sup>+</sup>&gt;GAL4, UAS-GFP / UAS-myrRFP ; FRT82B, tub-GAL80 / UAS-Dcr2, FRT82B, scrib<sup>l</sup></i>                                                              |
|        | D         | <i>y<sup>-</sup>, w<sup>-</sup>, eyFLP<sup>2</sup> ; Act&gt;y<sup>+</sup>&gt;GAL4, UAS-GFP / UAS-Ptp61F<sup>RNAi</sup> (v37436) ; FRT82B, tub-GAL80 / UAS-Dcr2, FRT82B, scrib<sup>l</sup></i>                                      |
| 3      | A         | <i>y<sup>-</sup>, w<sup>-</sup>, eyFLP<sup>2</sup> ; Act&gt;y<sup>+</sup>&gt;GAL4, UAS-GFP / UAS-myrRFP ; FRT82B, tub-GAL80 / UAS-Dcr2, FRT82B</i>                                                                                 |
|        | B         | <i>y<sup>-</sup>, w<sup>-</sup>, eyFLP<sup>2</sup> ; Act&gt;y<sup>+</sup>&gt;GAL4, UAS-GFP / UAS-Ptp61F<sup>RNAi</sup> (v37436) ; FRT82B, tub-GAL80 / UAS-Dcr2, FRT82B</i>                                                         |
|        | C         | <i>y<sup>-</sup>, w<sup>-</sup>, eyFLP<sup>2</sup> ; Act&gt;y<sup>+</sup>&gt;GAL4, UAS-GFP / UAS-Stat92E<sup>RNAi</sup> (v43866) ; FRT82B, tub-GAL80 / UAS-Dcr2, FRT82B</i>                                                        |
|        | D         | <i>y<sup>-</sup>, w<sup>-</sup>, eyFLP<sup>2</sup> ; Act&gt;y<sup>+</sup>&gt;GAL4, UAS-GFP / UAS-Ptp61F<sup>RNAi</sup> (v37436), UAS-Stat92E<sup>RNAi</sup> (v43866) ; FRT82B, tub-GAL80 / UAS-Dcr2, FRT82B</i>                    |
|        | E         | <i>y<sup>-</sup>, w<sup>-</sup>, eyFLP<sup>2</sup> ; Act&gt;y<sup>+</sup>&gt;GAL4, UAS-GFP / UAS-Ptp61F<sup>RNAi</sup> (v37436) ; FRT82B, tub-GAL80 / UAS-Dcr2, FRT82B</i>                                                         |
|        | F         | <i>y<sup>-</sup>, w<sup>-</sup>, eyFLP<sup>2</sup> ; Act&gt;y<sup>+</sup>&gt;GAL4, UAS-GFP / UAS-Ptp61F<sup>RNAi</sup> (v37436) ; FRT82B, tub-GAL80 / UAS-Dcr2, FRT82B, scrib<sup>l</sup></i>                                      |
|        | G         | <i>y<sup>-</sup>, w<sup>-</sup>, eyFLP<sup>2</sup> ; Act&gt;y<sup>+</sup>&gt;GAL4, UAS-GFP / UAS-Stat92E<sup>RNAi</sup> (v43866) ; FRT82B, tub-GAL80 / UAS-Dcr2, FRT82B, scrib<sup>l</sup></i>                                     |
|        | H         | <i>y<sup>-</sup>, w<sup>-</sup>, eyFLP<sup>2</sup> ; Act&gt;y<sup>+</sup>&gt;GAL4, UAS-GFP / UAS-Ptp61F<sup>RNAi</sup> (v37436), UAS-Stat92E<sup>RNAi</sup> (v43866) ; FRT82B, tub-GAL80 / UAS-Dcr2, FRT82B, scrib<sup>l</sup></i> |
| 4      | A,F       | <i>y<sup>-</sup>, w<sup>-</sup>, eyFLP<sup>2</sup> ; Act&gt; y<sup>+</sup>&gt;GAL4, UAS-GFP / UAS-myrRFP ; FRT82B, tub-GAL80 / FRT82B</i>                                                                                          |
|        | B         | <i>y<sup>-</sup>, w<sup>-</sup>, eyFLP<sup>2</sup> ; Act&gt; y<sup>+</sup>&gt;GAL4, UAS-GFP / UAS-Ptp61Fn<sup>2.1</sup> ; FRT82B, tub-GAL80 / FRT82B</i>                                                                           |
|        | C,H       | <i>y<sup>-</sup>, w<sup>-</sup>, eyFLP<sup>2</sup> ; Act&gt; y<sup>+</sup>&gt;GAL4, UAS-GFP / UAS-myrRFP ; FRT82B, tub-GAL80, scrib<sup>l</sup> / FRT82B</i>                                                                       |
|        | D         | <i>y<sup>-</sup>, w<sup>-</sup>, eyFLP<sup>2</sup> ; Act&gt; y<sup>+</sup>&gt;GAL4, UAS-GFP / UAS-Ptp61Fn<sup>2.1</sup> ; FRT82B, tub-GAL80, scrib<sup>l</sup> / FRT82B</i>                                                        |

|                         |          |                                                                                                                                                                                                 |
|-------------------------|----------|-------------------------------------------------------------------------------------------------------------------------------------------------------------------------------------------------|
|                         | G        | <i>y<sup>-</sup>, w<sup>-</sup>, eyFLP<sup>2</sup> ; Act&gt;y<sup>+</sup>&gt;GAL4, UAS-GFP / UAS-Ptp61F<sup>RNAi</sup> (v37436) ; FRT82B, tub-GAL80 / UAS-Dcr2, FRT82B</i>                      |
|                         | I        | <i>y<sup>-</sup>, w<sup>-</sup>, eyFLP<sup>2</sup> ; Act&gt;y<sup>+</sup>&gt;GAL4, UAS-GFP / UAS-Ptp61F<sup>RNAi</sup> (v37436) ; FRT82B, tub-GAL80, scrib<sup>l</sup> / UAS-Dcr2, FRT82B</i>   |
| 5                       | A        | <i>eyFLP ; UAS-GFP / + ; Actin&gt;CD2&gt;GAL4, UAS-GFP / +</i>                                                                                                                                  |
|                         | B,F      | <i>eyFLP ; UAS-Ras85D<sup>V12</sup>, UAS-dlg1<sup>RNAi</sup> (v41134) / UAS-GFP ; Actin&gt;CD2&gt;GAL4, UAS-GFP / +</i>                                                                         |
|                         | C,C',G   | <i>eyFLP ; UAS-Ras85D<sup>V12</sup>, UAS-dlg1<sup>RNAi</sup> (v41134) / UAS-Ptp61F<sup>RNAi</sup> (v37436) ; Actin&gt;CD2&gt;GAL4, UAS-GFP / +</i>                                              |
|                         | D,D',H   | <i>eyFLP ; UAS-Ras85D<sup>V12</sup>, UAS-dlg1<sup>RNAi</sup> (v41134) / UAS-Ptp61Fn<sup>2.1</sup> ; Actin&gt;CD2&gt;GAL4, UAS-GFP / +</i>                                                       |
| 6                       | A,C      | <i>eyFLP ; UAS-Ras85D<sup>V12</sup>, UAS-dlg1<sup>RNAi</sup> (v41134) / + ; Actin&gt;CD2&gt;GAL4, UAS-GFP / Stat92E-lacZ</i>                                                                    |
|                         |          | <i>eyFLP ; UAS-Ras85D<sup>V12</sup>, UAS-dlg1<sup>RNAi</sup> (v41134) / UAS-Ptp61F<sup>RNAi</sup> (v37436) ; Actin&gt;CD2&gt;GAL4, UAS-GFP / Stat92E-lacZ</i>                                   |
|                         |          | <i>eyFLP ; UAS-Ras85D<sup>V12</sup>, UAS-dlg1<sup>RNAi</sup> (v41134) / UAS-Ptp61Fn<sup>2.1</sup> ; Actin&gt;CD2&gt;GAL4, UAS-GFP / Stat92E-lacZ</i>                                            |
|                         |          | <i>eyFLP ; + / +, tub-GAL80 ; Actin&gt;CD2&gt;GAL4, UAS-GFP / Stat92E-lacZ</i>                                                                                                                  |
|                         |          | <i>eyFLP ; + / UAS-Ptp61F<sup>RNAi</sup> (v37436), tub-GAL80 ; Actin&gt;CD2&gt;GAL4, UAS-GFP / Stat92E-lacZ</i>                                                                                 |
|                         |          | <i>eyFLP ; + / UAS-Ptp61Fn<sup>2.1</sup> ; Actin&gt;CD2&gt;GAL4, UAS-GFP / Stat92E-lacZ</i>                                                                                                     |
| 7                       | A,A',A'' | <i>10×Stat92E-GFP / + ; eq-GAL4, UAS-RFP / +</i>                                                                                                                                                |
|                         | B,B',B'' | <i>10×Stat92E-GFP / UAS-Ras85D<sup>V12</sup>, UAS-dlg1<sup>RNAi</sup> (v41134) ; eq-GAL4, UAS-RFP / +</i>                                                                                       |
|                         | C,C',C'' | <i>10×Stat92E-GFP / UAS-Ras85D<sup>V12</sup>, UAS-dlg1<sup>RNAi</sup> (v41134) ; eq-GAL4, UAS-RFP / UAS-Ptp61Fn<sup>4.1</sup></i>                                                               |
|                         | D,D',D'' | <i>10×Stat92E-GFP / UAS-Ras85D<sup>V12</sup>, UAS-dlg1<sup>RNAi</sup> (v41134) ; eq-GAL4, UAS-RFP / Ptp61F<sup>Δ</sup></i>                                                                      |
| Supplementary Figure S2 | A,F      | <i>y<sup>-</sup>, w<sup>-</sup>, eyFLP<sup>2</sup> ; Act&gt;y<sup>+</sup>&gt;GAL4, UAS-GFP / UAS-myrRFP ; FRT82B, tub-GAL80 / UAS-Dcr2, FRT82B</i>                                              |
|                         | B        | <i>y<sup>-</sup>, w<sup>-</sup>, eyFLP<sup>2</sup> ; Act&gt;y<sup>+</sup>&gt;GAL4, UAS-GFP / UAS-Socs44A<sup>RNAi</sup> (v102764) ; FRT82B, tub-GAL80 / UAS-Dcr2, FRT82B</i>                    |
|                         | C,H      | <i>y<sup>-</sup>, w<sup>-</sup>, eyFLP<sup>2</sup> ; Act&gt;y<sup>+</sup>&gt;GAL4, UAS-GFP / UAS-myrRFP ; FRT82B, tub-GAL80 / UAS-Dcr2, FRT82B, scrib<sup>l</sup></i>                           |
|                         | D        | <i>y<sup>-</sup>, w<sup>-</sup>, eyFLP<sup>2</sup> ; Act&gt;y<sup>+</sup>&gt;GAL4, UAS-GFP / UAS-Socs44A<sup>RNAi</sup> (v102764) ; FRT82B, tub-GAL80 / UAS-Dcr2, FRT82B, scrib<sup>l</sup></i> |
|                         | G        | <i>y<sup>-</sup>, w<sup>-</sup>, eyFLP<sup>2</sup> ; Act&gt;y<sup>+</sup>&gt;GAL4, UAS-GFP / UAS-Socs36E<sup>RNAi</sup> (v52182) ; FRT82B, tub-GAL80 / UAS-Dcr2, FRT82B</i>                     |

|  |   |                                                                                                                                                                                                   |
|--|---|---------------------------------------------------------------------------------------------------------------------------------------------------------------------------------------------------|
|  | I | <i>y<sup>-</sup>, w<sup>-</sup>, eyFLP<sup>2</sup>; Act&gt;y<sup>+</sup>&gt;GAL4, UAS-GFP / UAS- Socs36E<sup>RNAi</sup><br/>(v52182); FRT82B, tub-GAL80 / UAS-Dcr2, FRT82B, scrib<sup>l</sup></i> |
|--|---|---------------------------------------------------------------------------------------------------------------------------------------------------------------------------------------------------|
