# Supplementary material for: PTP61F Mediates Cell Competition and Mitigates Tumorigenesis
Source: MDPI journal article supplement (doi:10.3390/ijms222312732), 2021-11-25
Supplement: s1 [file s1]

**Supplementary Table S1. Fly stocks.** This table contains the details of all the *Drosophila melanogaster* stocks and/or transgenic lines used in this study.

| Designation                                                                                                                           | Alternate designations                | Source                             | Stock IDs and Additional Information                                                                                                                                   | References                            |
|---------------------------------------------------------------------------------------------------------------------------------------|---------------------------------------|------------------------------------|------------------------------------------------------------------------------------------------------------------------------------------------------------------------|---------------------------------------|
| <i>hsFLP<sup>l22</sup> ; ; Ubi-GFP, FRT80B</i>                                                                                        |                                       | 1620 was from Leonie Quinn         | Constructed by combining BDSC stocks: <i>w<sup>-</sup> ; Ubi-GFP, FRT80B</i> (1620) and <i>hsFLP<sup>l22</sup>, y<sup>-</sup>, w<sup>-</sup> ; vasa-phiC31</i> (23649) |                                       |
| <i>Ptp61F<sup>Δ</sup></i>                                                                                                             |                                       | Coral Warr                         |                                                                                                                                                                        | Buszard et al., 2013                  |
| <i>FRT80B</i>                                                                                                                         |                                       | BDSC                               | 2035                                                                                                                                                                   |                                       |
| <i>FRT82B</i>                                                                                                                         |                                       | BDSC                               | 1988                                                                                                                                                                   |                                       |
| <i>y<sup>-</sup>, w<sup>-</sup>, eyFLP<sup>2</sup> ; Act&gt;y<sup>+</sup>&gt;GAL4, UAS-GFP ; FRT82B, tub-GAL80</i>                    | <i>MARCM82B</i>                       | Original stock was from Xianjue Ma | Constructed by combining MARCM stock from Xianjue Ma with BDSC stock: <i>eyFLP<sup>2</sup>, w<sup>-</sup>, y<sup>-</sup></i> (5580)                                    |                                       |
| <i>y<sup>-</sup>, w<sup>-</sup>, eyFLP<sup>2</sup> ; Act&gt;y<sup>+</sup>&gt;GAL4, UAS-GFP ; FRT82B, tub-GAL80, scrib<sup>l</sup></i> | <i>revMARCM82B</i>                    | Original stock was from Xianjue Ma | Constructed by combining BDSC stock 5580 with stock from Xianjue Ma                                                                                                    |                                       |
| <i>scrib<sup>l</sup></i>                                                                                                              |                                       | David Bilder                       |                                                                                                                                                                        | Bilder & Perrimon 2000                |
| <i>UAS-Ptp61F<sup>IsoB2.1</sup></i>                                                                                                   | <i>Ptp61Fn<sup>2.1</sup>, Ptp61Fn</i> | Coral Warr                         | Nuclear-localised isoform, 2 <sup>nd</sup> chromosome insertion (2.1)                                                                                                  | Wu et al., 2011; Buszard et al., 2013 |

|                                                                                                                            |                                               |                                                                                          |                                                                       |                                       |
|----------------------------------------------------------------------------------------------------------------------------|-----------------------------------------------|------------------------------------------------------------------------------------------|-----------------------------------------------------------------------|---------------------------------------|
| <i>UAS-Ptp61F<sup>IsoB4.1</sup></i>                                                                                        | <i>Ptp61Fn<sup>4.1</sup></i>                  | Coral Warr                                                                               | Nuclear-localised isoform, 3 <sup>rd</sup> chromosome insertion (4.1) | Wu et al., 2011; Buszard et al., 2013 |
| <i>equatorial-GAL4</i>                                                                                                     | <i>eq-GAL4</i>                                | Henry Sun                                                                                |                                                                       | Tang and Sun, 2002                    |
| <i>10×Stat92E-GFP</i>                                                                                                      | <i>10×Stat-GFP</i>                            | Erica Bach                                                                               |                                                                       | Bach et al. 2007                      |
| <i>UAS-myrRFP</i>                                                                                                          | <i>UAS-RFP</i>                                | BDSC                                                                                     |                                                                       |                                       |
| <i>eyFLP ; ; Actin&gt;CD2&gt;GAL4, UAS-GFP</i>                                                                             | <i>EAG, eyFLPout, eyFLP ; Act&gt;&gt;GAL4</i> | Generated from combining eyFLP with the Act>>GAL4 UAS-GFP (obtained from Laura Johnston) |                                                                       |                                       |
| <i>eyFLP ; UAS-Ras85D<sup>V12</sup>, UAS-dlg1<sup>RNAi</sup> (v41134) / CyO, tub-GAL80 ; Actin&gt;CD2&gt;GAL4, UAS-GFP</i> | <i>EAGRD</i>                                  | Konrad Basler                                                                            |                                                                       | Willecke et al., 2011                 |
| <i>UAS-Ptp61F RNAi</i>                                                                                                     | <i>Ptp61F<sup>RNAi</sup></i>                  | VDRC                                                                                     | v37436                                                                |                                       |
| <i>UAS-Stat92E RNAi</i>                                                                                                    |                                               | VDRC                                                                                     | v43866                                                                |                                       |
| <i>UAS-Socs44A RNAi</i>                                                                                                    |                                               | VDRC                                                                                     | v102764                                                               |                                       |
| <i>UAS-Socs36E RNAi</i>                                                                                                    |                                               | VDRC                                                                                     | v52182                                                                |                                       |
| <i>UAS-Dicer-2</i>                                                                                                         | <i>Dcr2</i>                                   | VDRC                                                                                     | v60009                                                                |                                       |
| <i>UAS-luciferase RNAi</i>                                                                                                 |                                               | BDSC                                                                                     | 31603                                                                 |                                       |
